## CORRECTION

# Correction: Metagenomics analysis reveals features unique to Indian distal gut microbiota

The *PLOS ONE* Staff

The fifth author, T. N. C. Ramya, was incorrectly attributed equal contribution to this work with Kamaldeep Kaur, Indu Khatri, and Akil Akhtar. Only the first three authors, Kamaldeep Kaur, Indu Khatri, and Akil Akhtar, should be noted as contributing equally to this work. The publisher apologizes for the error.

## Reference

1. Kaur K, Khatri I, Akhtar A, Subramanian S, Ramya TNC (2020) Metagenomics analysis reveals features unique to Indian distal gut microbiota. *PLoS ONE* 15(4): e0231197. <https://doi.org/10.1371/journal.pone.0231197> PMID: 32267865

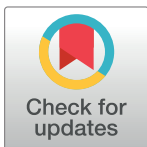

## OPEN ACCESS

**Citation:** The *PLOS ONE* Staff (2020) Correction: Metagenomics analysis reveals features unique to Indian distal gut microbiota. *PLoS ONE* 15(12): e0243397. <https://doi.org/10.1371/journal.pone.0243397>

**Published:** December 1, 2020

**Copyright:** © 2020 The PLOS ONE Staff. This is an open access article distributed under the terms of the [Creative Commons Attribution License](https://creativecommons.org/licenses/by/4.0/), which permits unrestricted use, distribution, and reproduction in any medium, provided the original author and source are credited.
